# Supplementary material for: Broccoli Sprouts Promote Sex-Dependent Cardiometabolic Health and Longevity in Long-Evans Rats
Source: MDPI journal article supplement (doi:10.3390/ijerph192013468), 2022-10-18
Supplement: s1 [file s1]

Supplementary materials to:

## **Broccoli Sprouts Promote Sex-Dependent Cardiometabolic Health and Longevity in Long-Evans Rats**

**Ronan M. N. Noble** <sup>1,2,†</sup>, **Forough Jahandideh** <sup>2,3,†</sup>, **Edward A. Armstrong** <sup>1</sup>, **Stephane L. Bourque** <sup>1,2,3,4,\*</sup>  
and **Jerome Y. Yager** <sup>1,2,\*</sup>

**Table S1.** Criteria used for the humane endpoint and euthanasia in rats

| Parameter               | Condition                                                                                           |
|-------------------------|-----------------------------------------------------------------------------------------------------|
| Weight loss             | Body weight loss of more than 20% from their top weight                                             |
| Breathing abnormalities | Respiratory distress, labored breathing, increased or decreased respiratory rate, cyanosis          |
| Bleeding/open sores     | When there is a prolapse of rectum/vagina/penis or rat cannot urinate                               |
| Tumor volume or burden  | Tumor(s) ulcerated, necrotic, exceeding 3 cm or impairing function (interfere with quality of life) |
| Limb paralysis          |                                                                                                     |
| Dermatitis              |                                                                                                     |
| Malocclusion            |                                                                                                     |

**Table S2.** Observed morbidities at the time of euthanasia in control and BrSp-fed rats

| Groups     | ID | Age (days) | Humane endpoint                | Cardiopulmonary | Kidney | Liver | Brain | Tumor | Other conditions    |
|------------|----|------------|--------------------------------|-----------------|--------|-------|-------|-------|---------------------|
| Male-Ctl   | 1  | 608        | Weight Loss                    | 1               | 1      |       |       |       |                     |
|            | 2  | 570        | Weight Loss                    | 1               | 1      |       |       |       |                     |
|            | 3  | 779        | Breathing Problems/pain        | 1               |        | 1     |       | 1     | Hemangiosarcoma     |
|            | 4  | 779        | Unknown (found dead)           |                 |        |       |       |       |                     |
|            | 5  | 752        | Weight Loss                    |                 | 1      |       |       |       |                     |
|            | 6  | 612        | Weight Loss                    | 1               | 1      |       |       |       |                     |
|            | 7  | 617        | Movement issues                |                 |        |       | 1     |       |                     |
|            | 8  | 672        | Rear leg paralysis             | 1               | 1      |       |       |       |                     |
|            | 9  | 706        | Weight Loss                    | 1               | 1      |       | 1     | 1     |                     |
|            | 10 | 679        | Tumor                          | 1               | 1      |       |       | 1     |                     |
|            | 11 | 540        | Weight Loss                    | 1               | 1      |       | 1     |       |                     |
|            | 12 | 442        | Weight loss                    | 1               | 1      |       |       |       |                     |
|            | 13 | 651        | Weight Loss                    | 1               | 1      | 1     | 1     |       | Fast Clotting blood |
|            | 14 | 675        | Weight Loss                    | 1               | 1      | 1     |       |       |                     |
| Sum        |    |            |                                | 11              | 11     | 3     | 4     | 3     |                     |
| Male-BrSp  | 1  | 501        | Unknown (found dead)           |                 |        |       |       |       |                     |
|            | 2  | 559        | Weight Loss/problems Breathing | 1               |        |       |       |       |                     |
|            | 3  | 452        | Unknown (found dead)           |                 |        |       |       | 1     |                     |
|            | 4  | 809        | Weight Loss                    | 1               |        |       |       | 1     |                     |
|            | 5  | 849        | Weight Loss                    | 1               | 1      | 1     |       |       |                     |
|            | 6  | 884        | Weight Loss                    | 1               | 1      |       | 1     |       |                     |
|            | 7  | 502        | Unknown (found dead)           |                 |        |       |       |       |                     |
|            | 8  | 612        | Weight Loss                    | 1               |        |       |       |       |                     |
|            | 9  | 812        | Problems Breathing/not eating  | 1               |        | 1     |       |       |                     |
|            | 10 | 801        | Malocclusion                   | 1               | 1      | 1     |       | 1     |                     |
|            | 11 | 635        | Weight Loss                    |                 | 1      |       |       |       |                     |
|            | 12 | 545        | Weight Loss                    | 1               | 1      |       |       |       |                     |
|            | 13 | 619        | Weight Loss                    | 1               | 1      |       |       |       |                     |
|            | 14 | 675        | Weight Loss                    | 1               | 1      | 1     |       |       |                     |
| Sum        |    |            |                                | 10              | 7      | 4     | 1     | 3     |                     |
| Female-Ctl | 1  | 641        | Malocclusion                   |                 |        |       |       |       |                     |
|            | 2  | 557        | Malocclusion                   |                 |        |       |       |       |                     |
|            | 3  | 793        | Tumor                          |                 |        |       |       | 1     |                     |
|            | 4  | 840        | Weight Loss                    | 1               | 1      |       | 1     |       | Porphyrin from nose |
|            | 5  | 855        | Tumor                          | 1               |        | 1     |       | 1     |                     |
|            | 6  | 612        | Tumor                          | 1               |        |       |       | 1     |                     |
|            | 7  | 690        | Weight Loss                    |                 |        |       |       | 1     |                     |
|            | 8  | 576        | Tumor                          | 1               |        |       |       | 1     |                     |
|            | 9  | 899        | Malocclusion                   | 1               |        |       | 1     |       |                     |
|            | 10 | 476        | Difficulty breathing           | 1               |        |       |       |       |                     |

|             |    |     |                            |   |   |   |   |   |                           |
|-------------|----|-----|----------------------------|---|---|---|---|---|---------------------------|
|             | 11 | 741 | Weight Loss/pain           | 1 | 1 | 1 | 1 | 1 |                           |
|             | 12 | 716 | Unknown (found dead)       |   |   |   |   |   |                           |
|             | 13 | 892 | Weight Loss                | 1 | 1 |   |   |   |                           |
|             | 14 | 850 | Weight Loss                | 1 | 1 | 1 |   | 1 |                           |
| Sum         |    |     |                            | 9 | 4 | 3 | 3 | 7 |                           |
| Female-BrSp | 1  | 826 | Tumors                     | 1 |   |   |   | 1 |                           |
|             | 2  | 608 | Malocclusion               |   |   |   |   |   |                           |
|             | 3  | 638 | Dermatitis                 | 1 |   |   |   |   | Dermatitis                |
|             | 4  | 872 | Weight Loss                |   | 1 | 1 | 1 |   |                           |
|             | 5  | 856 | Tumor                      |   |   |   |   | 1 |                           |
|             | 6  | 884 | Impaired hindlimb movement |   | 1 |   | 1 |   | Loss of hindlimb function |
|             | 7  | 945 | Impaired hindlimb movement |   |   |   |   |   |                           |
|             | 8  | 956 | Unknown (found dead)       |   |   |   |   |   |                           |
|             | 9  | 619 | Tumor                      |   |   |   |   | 1 |                           |
|             | 10 | 866 | Tumor                      | 1 | 1 |   |   | 1 |                           |
|             | 11 | 803 | Weight Loss                | 1 | 1 |   | 1 |   | Abnormal stomach          |
|             | 12 | 721 | Tumors                     |   | 1 |   |   | 1 |                           |
|             | 13 | 903 | Malocclusion               |   | 1 |   |   |   |                           |
|             | 14 | 850 | Tumor                      | 1 | 1 |   |   | 1 |                           |
| Sum         |    |     |                            | 5 | 7 | 1 | 3 | 6 |                           |
